# Supplementary material for: Circulating microbial RNA and health
Source: PubMed Central journal article supplement (PMC4649493; doi:10.1038/srep16814), 2015-11-18
Supplement: srep16814-s1.pdf [file srep16814-s1.pdf]

# Circulating microbial RNA and health

Ross Ka-Kit Leung and Ying-Kit Wu

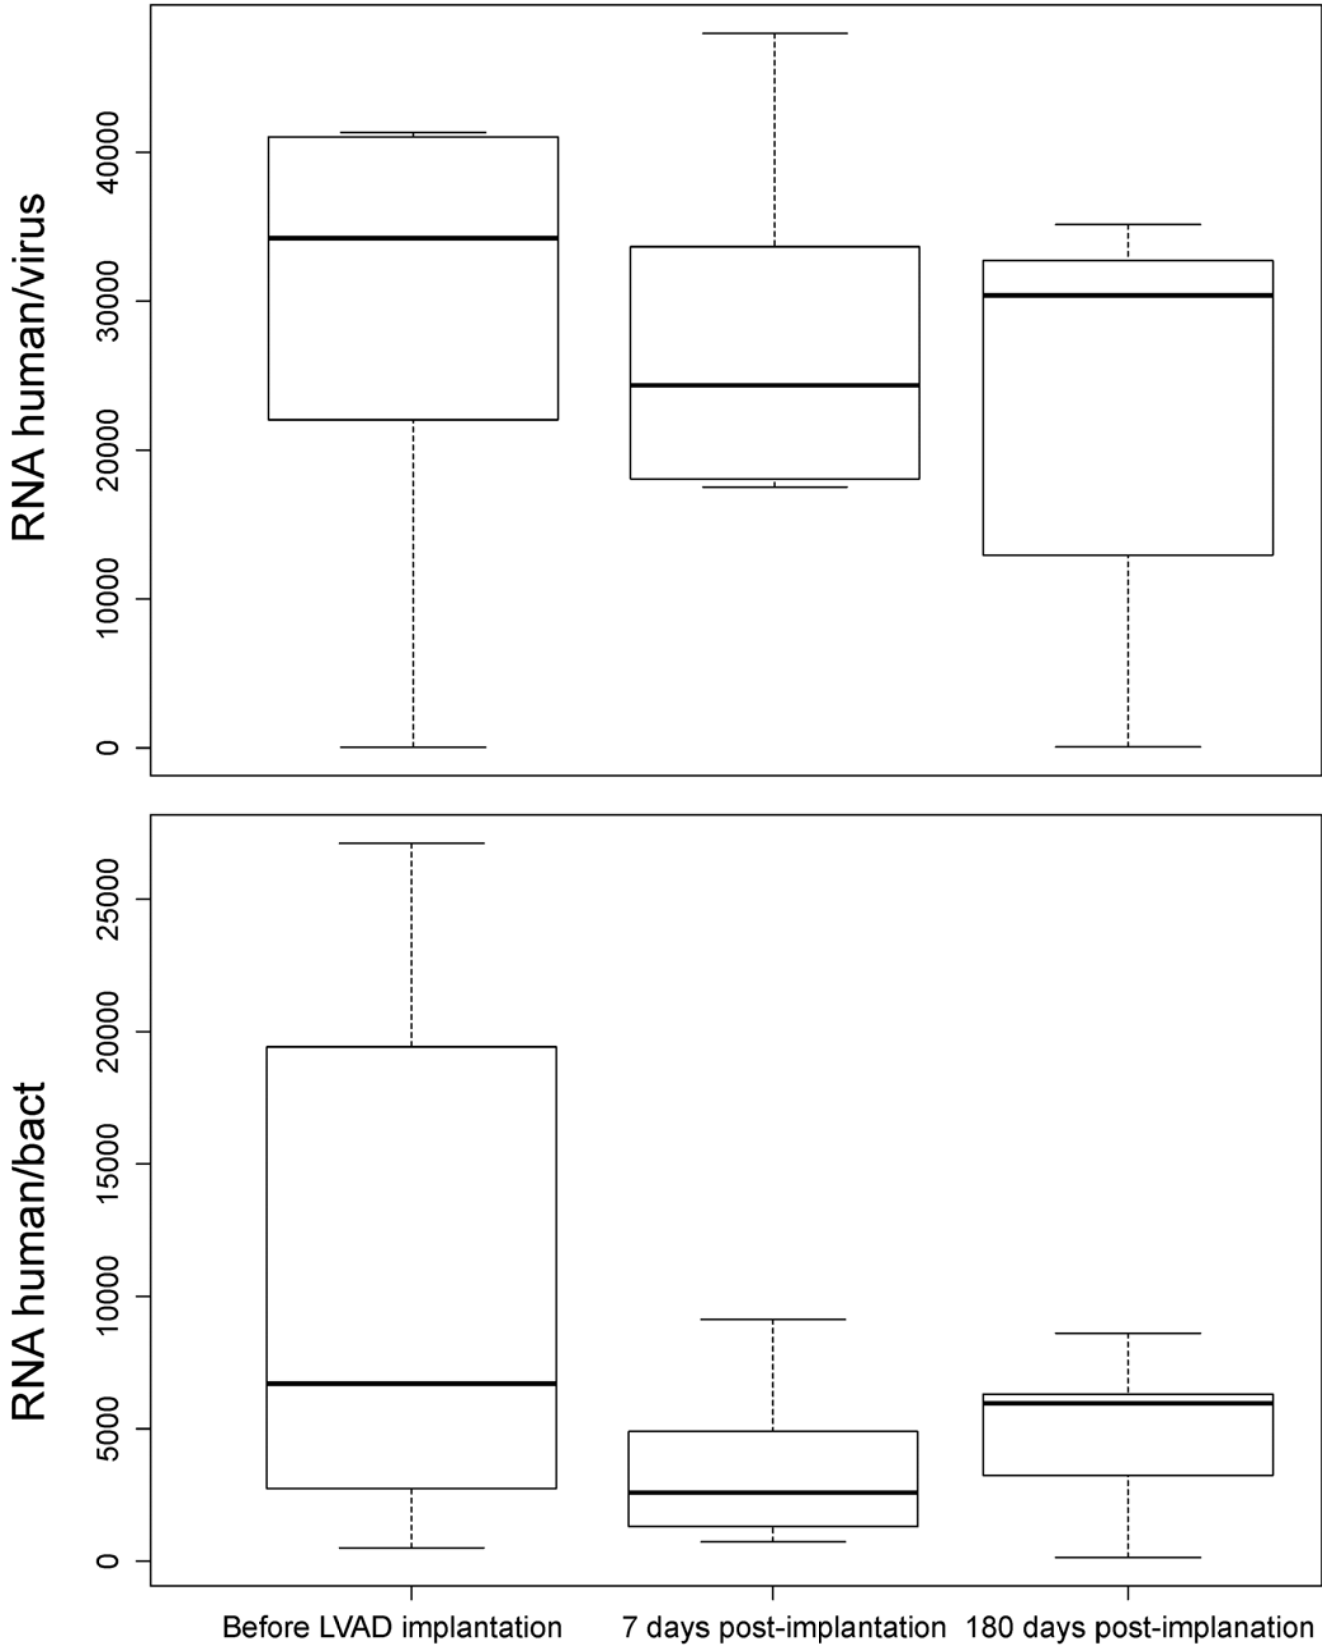

Supplemental Figure 1. Plots of RNA expression ratios of human to bacteria and human to virus at different time points for the nine end stage heart failure patients
